# Supplementary material for: Construction of strontium tantalate homo-semiconductor composite photocatalysts with a tunable type II junction structure for overall water splitting
Source: Royal Society of Chemistry journal article supplement (doi:10.1039/c8cy00283e), 2018-01-01
Supplement: c8cy00283e1.pdf [file c8cy00283e1.pdf]

## Supporting Information

# **Construction of strontium tantalate homo-semiconductor composite photocatalysts with tunable type II junction structure for overall water splitting**

Feng Sun,<sup>a,†</sup> Ping Wang,<sup>\*,a,b,†</sup> Zhouxiang Yi,<sup>a</sup> Michael Wark,<sup>\*,c</sup> Junhe Yang,<sup>a,b</sup> Xianying Wang<sup>\*,a,b</sup>

<sup>a</sup> School of Materials Science and Technology, University of Shanghai for Science and Technology, Jungong Rd.516, 200093 Shanghai, P.R. China

<sup>b</sup> Shanghai Innovation Institute for Materials, 200444 Shanghai, P.R. China

<sup>c</sup> Institute of Chemistry, Chemical Technology 1, Carl von Ossietzky University Oldenburg, Carl-von-Ossietzky Str. 9-11, 26129 Oldenburg, Germany

\* Corresponding authors. Email: ping.wang@usst.edu.cn (P.W.), michael.wark@uni-oldenburg.de (M.W.), xianyingwang@usst.edu.cn (X.Y.W.)

† The authors contribute equally to this work.

## Reaction setup

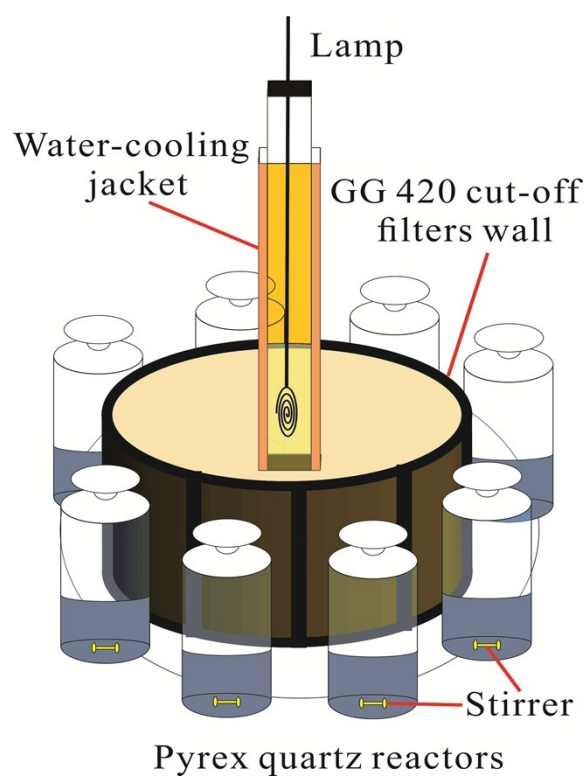

**Scheme S1.** An illustrative diagram of home-built multizone photocatalytic reaction system consisting of a 500 W mid-pressure Hg lamp and eight air-tight quartz reactors. The performance measurements of samples with the same Sr/Ta ratios prepared in different batches were reproducibly conducted at least three times.

## XRD Rietveld refinement

**a**

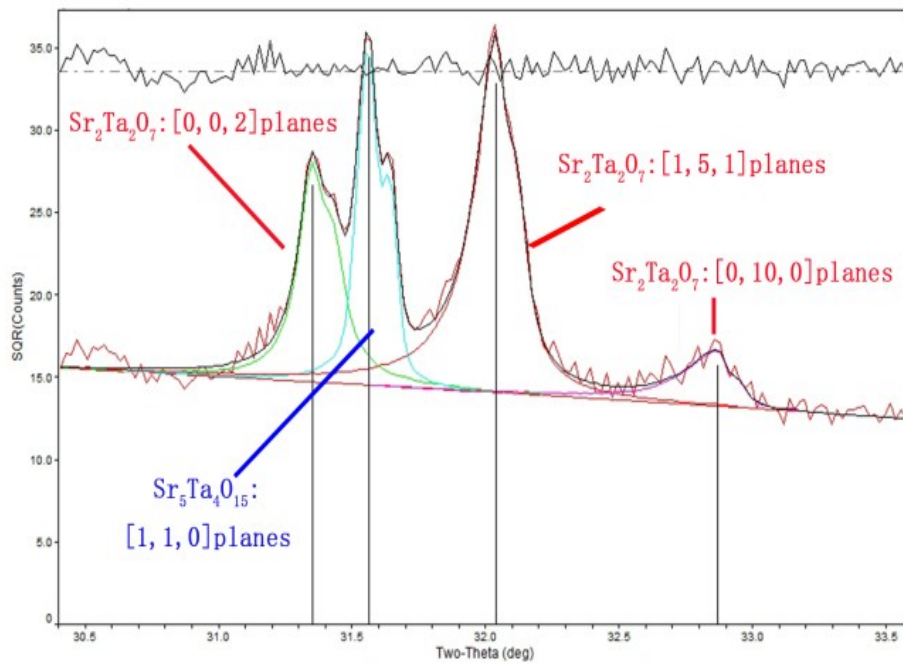

Materials Data, Inc.

**b**

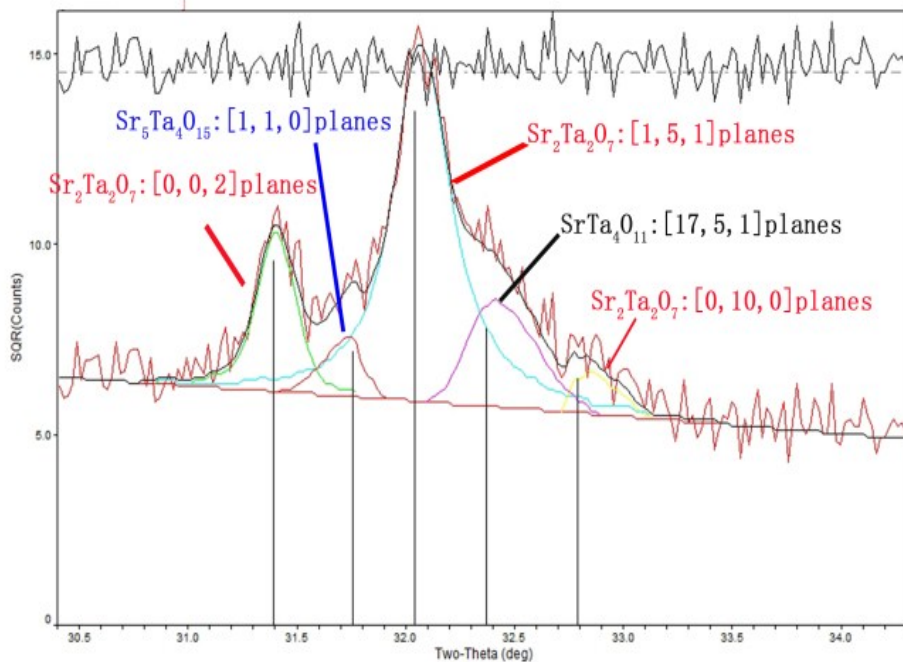

Materials Data, Inc.

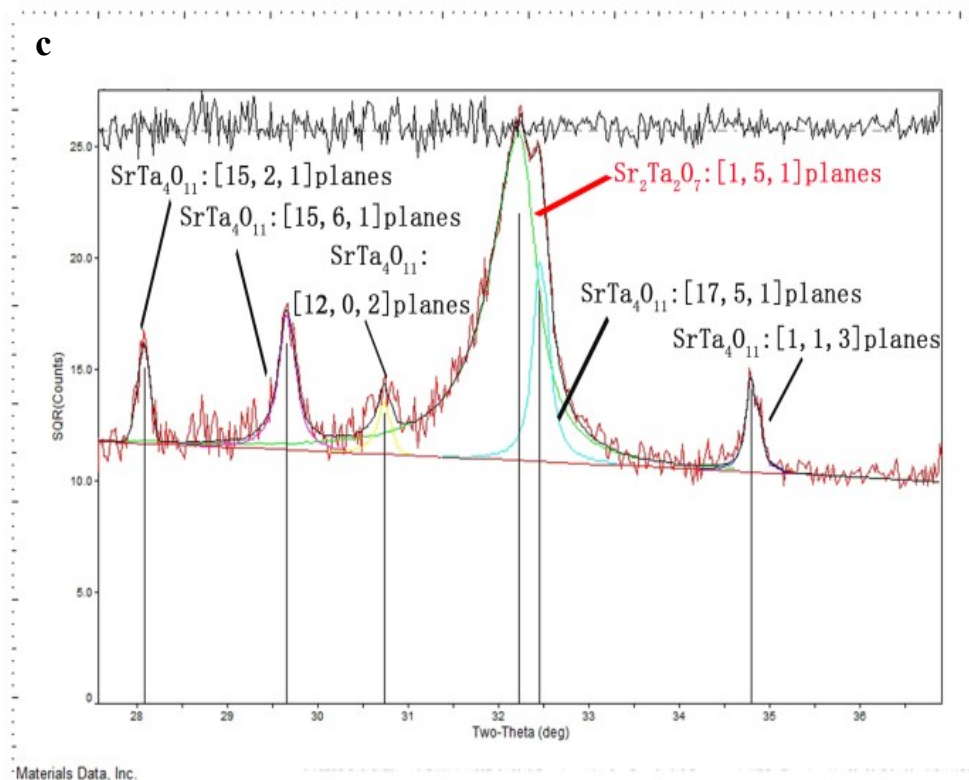

**Figure S1.** XRD Rietveld refinement of the typical SrTa<sub>0.77</sub> (a), SrTa<sub>1.2</sub> (b), and SrTa<sub>1.8</sub> (c) samples in the low-angle  $2\theta$  range.

## UV-Vis absorption spectra

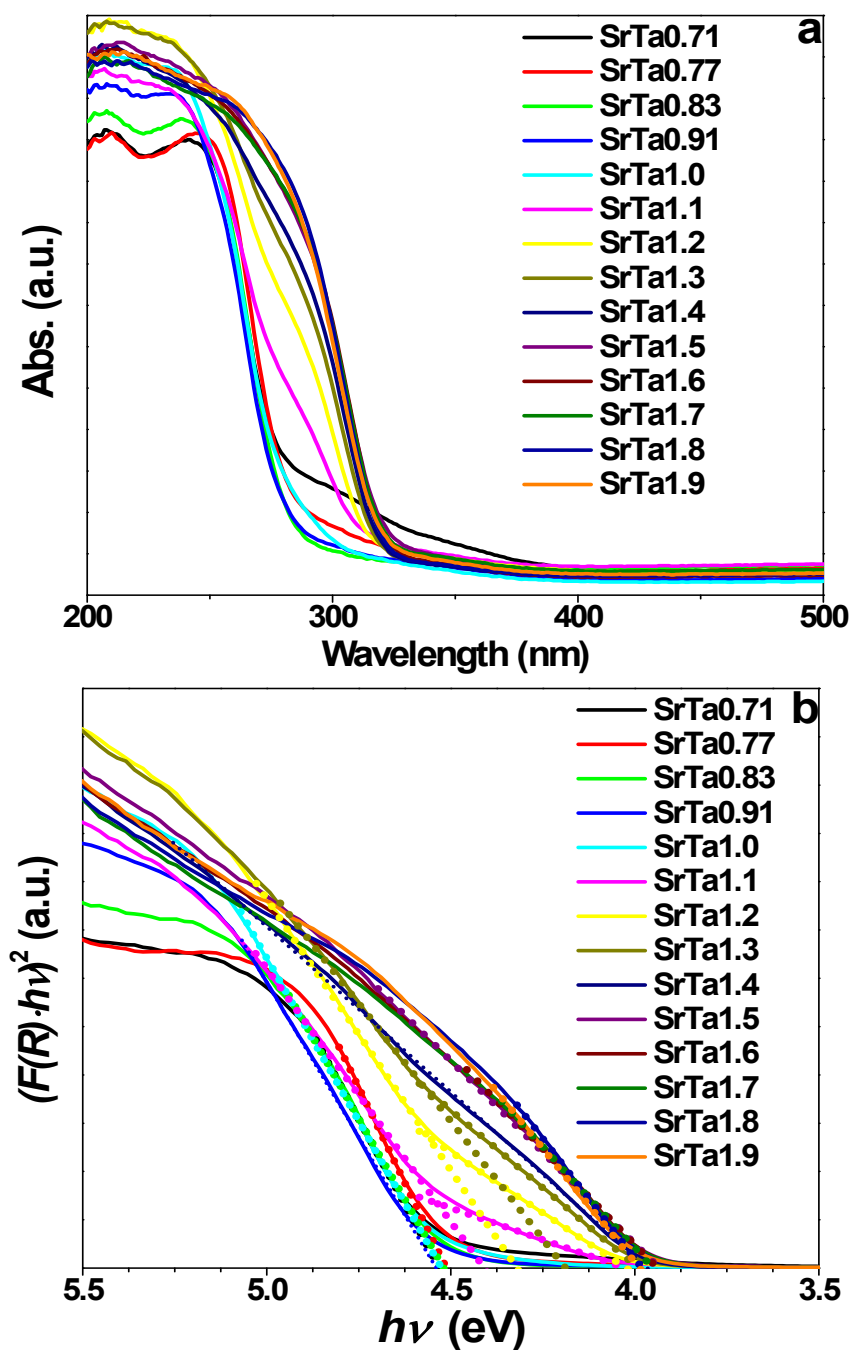

**Figure S2.** UV-Vis absorption spectra of the as-synthesized strontium tantalate samples with different Ta/Sr ratio (a) and Tauc plots (b).

## X-ray photoelectron spectroscopy (XPS)

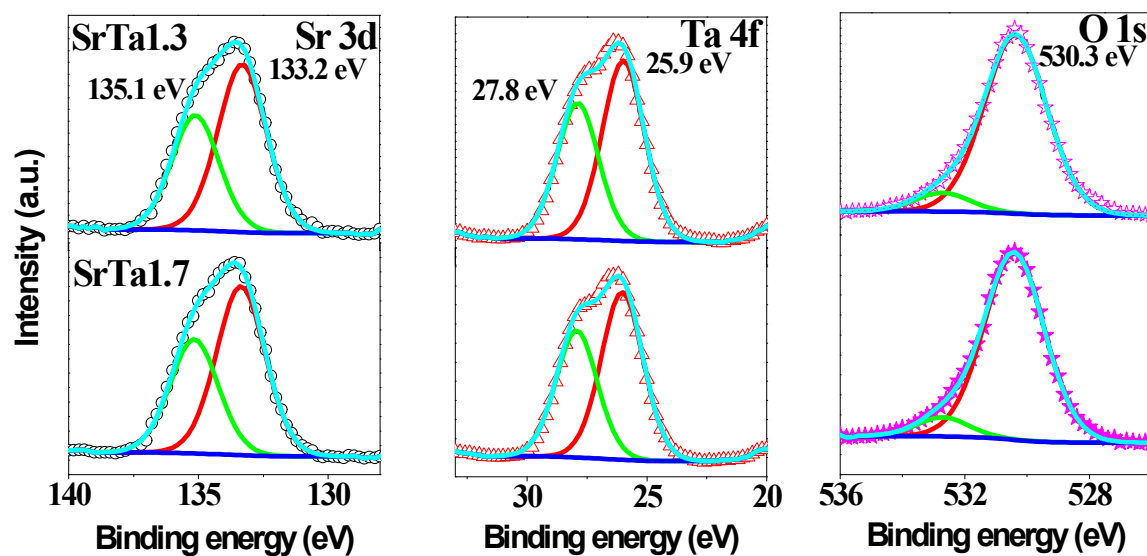

**Figure S3.** X-ray photoelectron spectra of narrow scans of Sr 3d, Ta 4f and O 1s regions for SrTa1.3 and SrTa1.7 samples.

## High-angle annular dark-field scanning TEM (HAADF-STEM) with energy dispersive X-ray (EDX) elemental mapping analyses

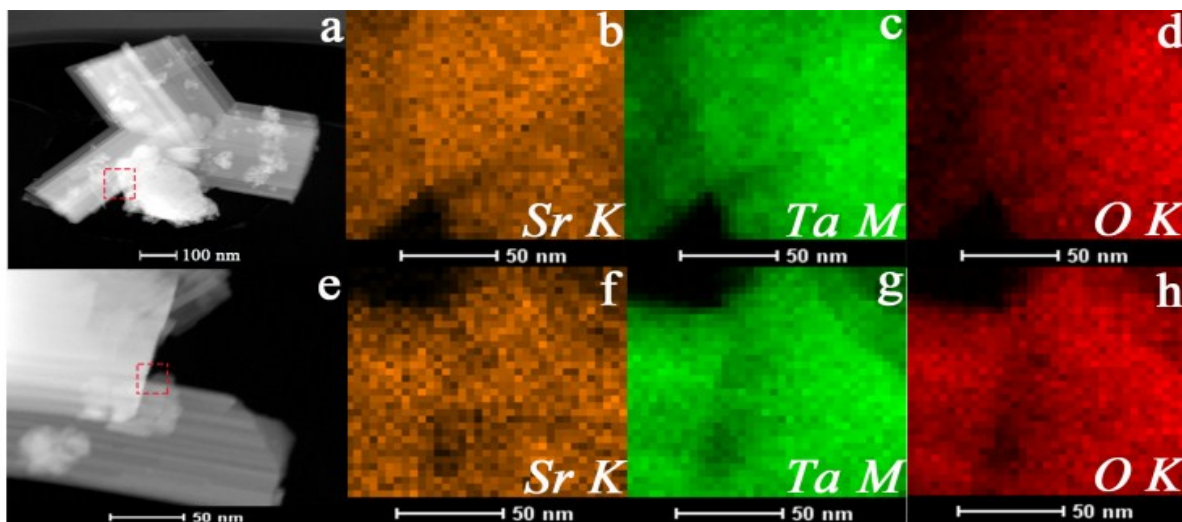

**Figure S4.** HAADF-STEM images of the as-synthesized samples: SrTa1.3 (a) and SrTa1.7 (b) and the corresponding elemental mapping images of Sr K (b and f), Ta M (c and g) and O K (d and h) on the selected area as indicated by the red dashed frame in a and e, respectively

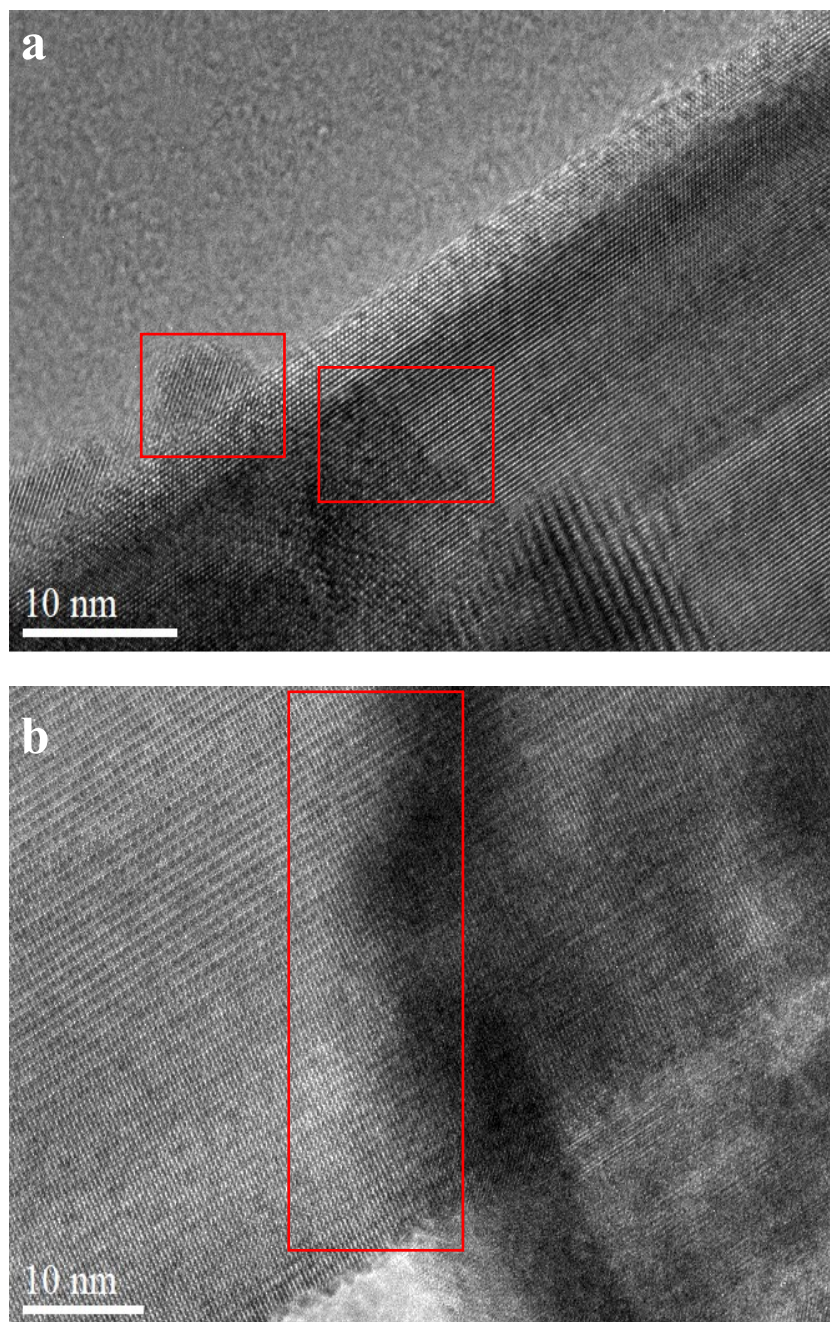

**Figure S5.** The HRTEM images of the typical SrTa<sub>1.3</sub> (a) and SrTa<sub>1.7</sub> (b) samples and the formation of the interface junctions among the phase components in an intimate manner (marked by red rectangles).

## Theoretical predictions of the position of band edges

The position of band edges of Sr<sub>5</sub>Ta<sub>4</sub>O<sub>15</sub>, Sr<sub>2</sub>Ta<sub>2</sub>O<sub>7</sub> and SrTa<sub>4</sub>O<sub>11</sub> are calculated by Butler and Ginley method using the equation related to Mulliken electronegativity.<sup>1</sup> Thereby, the conduction band (E<sub>CB</sub>) and valence band (E<sub>VB</sub>) edge positions can be calculated according to the empirical equations:

$$E_{CB} = \chi - E^e - 0.5E_g \quad (1)$$

$$E_{CB} = E_{VB} - E_g \quad (2)$$

where  $\chi$  is the electronegativity of the semiconductor, which is the geometric mean of the electronegativity of the constituent atoms,  $E^e$  is the energy of free electrons on the hydrogen scale (4.44 eV), and  $E_g$  is the band gap energy of the semiconductor. The  $\chi$  values for Sr<sub>5</sub>Ta<sub>4</sub>O<sub>15</sub>, Sr<sub>2</sub>Ta<sub>2</sub>O<sub>7</sub> and SrTa<sub>4</sub>O<sub>11</sub> are ca. 5.57 and 5.66 and 6.10 eV, respectively. The bottom conduction band level (E<sub>CB</sub>) of Sr<sub>5</sub>Ta<sub>4</sub>O<sub>15</sub> (-1.12 eV) is much more negative than that of Sr<sub>2</sub>Ta<sub>2</sub>O<sub>7</sub> (-1.02 eV) and SrTa<sub>4</sub>O<sub>11</sub> (-0.34 eV) and the top valence band level (VB) of Sr<sub>5</sub>Ta<sub>4</sub>O<sub>15</sub> (+3.38 eV) is more positive than that of Sr<sub>2</sub>Ta<sub>2</sub>O<sub>7</sub> (+3.48 eV) and SrTa<sub>4</sub>O<sub>11</sub> (+3.66 eV). The photogenerated electrons on surface of Sr<sub>5</sub>Ta<sub>4</sub>O<sub>15</sub> particles can successively transfer to Sr<sub>2</sub>Ta<sub>2</sub>O<sub>7</sub> and SrTa<sub>4</sub>O<sub>11</sub> via the formed interfaces, and simultaneously, the photogenerated holes on surface of SrTa<sub>4</sub>O<sub>11</sub> can transfer to Sr<sub>2</sub>Ta<sub>2</sub>O<sub>7</sub> and Sr<sub>5</sub>Ta<sub>4</sub>O<sub>15</sub> in turn.

**Table S1.** Estimation of the band positions of strontium tantalates.

|                                                 | $\chi$ | $E_g$ | $E_{CB}$ | $E_{VB}$ |
|-------------------------------------------------|--------|-------|----------|----------|
| Sr <sub>5</sub> Ta <sub>4</sub> O <sub>15</sub> | 5.57   | ~4.5  | -1.12    | +3.38    |
| Sr <sub>2</sub> Ta <sub>2</sub> O <sub>7</sub>  | 5.66   | ~4.5  | -1.02    | +3.48    |
| SrTa <sub>4</sub> O <sub>11</sub>               | 6.10   | ~4.0  | -0.34    | +3.66    |

## References

1. M. A. Butler and D. S. Ginley, *J. Electrochem. Soc.*, 1978, **125**, 228-232.
